# Supplementary material for: Novel hybrid Si film/carbon nanofibers as anode materials in lithium-ion batteries
Source: Royal Society of Chemistry journal article supplement (doi:10.1039/c4ta05804f), 2014-12-23
Supplement: c4ta05804f1.pdf [file c4ta05804f1.pdf]

Electronic Supplementary Information (ESI) for

**Novel hybrid Si film/carbon nanofiber for anode materials in lithium-ion batteries**

Haejune Kim, Xingkang Huang, Zhenhai Wen, Shumao Cui, Xiaoru Guo, and Junhong Chen

*Department of Mechanical Engineering, University of Wisconsin-Milwaukee,  
Milwaukee, Wisconsin 53211, USA*

*Junhong Chen, email: jhchen@uwm.edu; Fax: +1-414-229-6958; Tel: +1-414-229-2615*

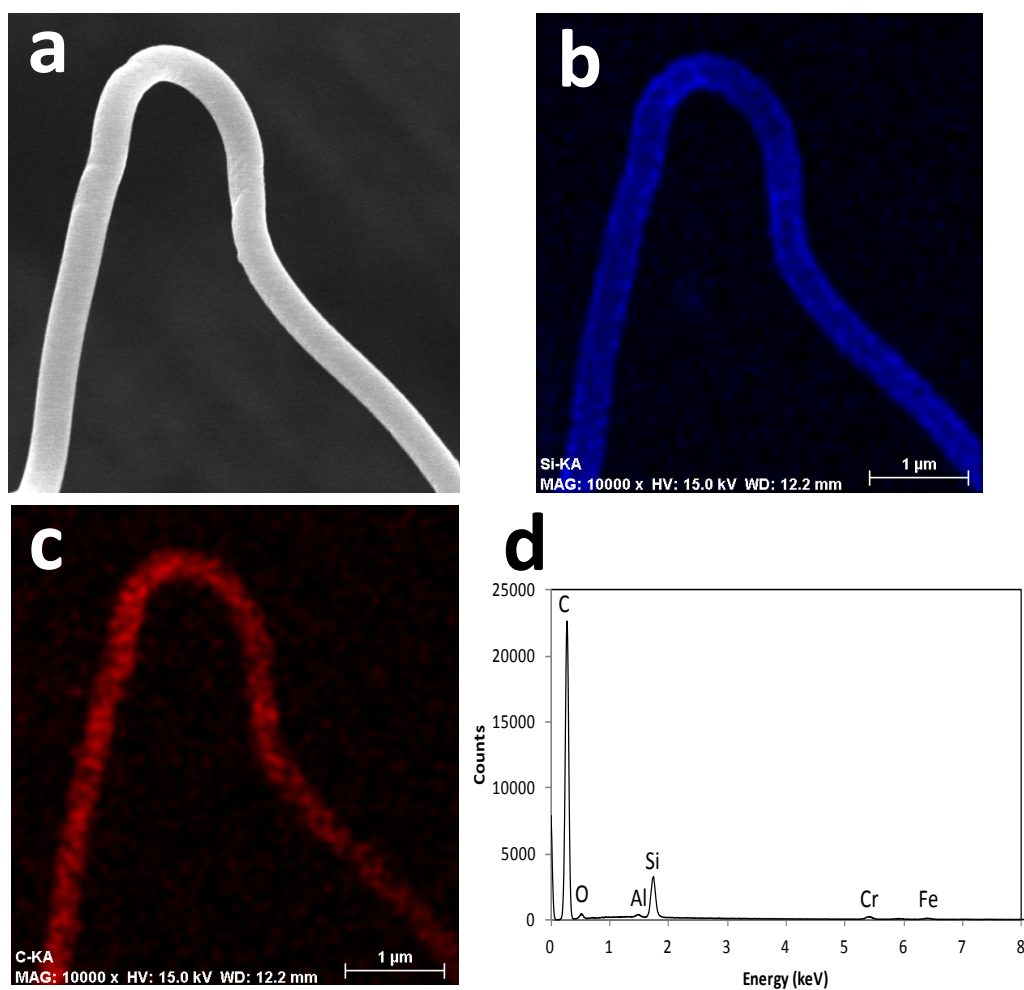

**Fig. S1.** (a) SEM secondary electron image, (b) and (c) Elemental maps of Si and C in Si/CNF, respectively, (d) EDS spectra of Si /CNF.

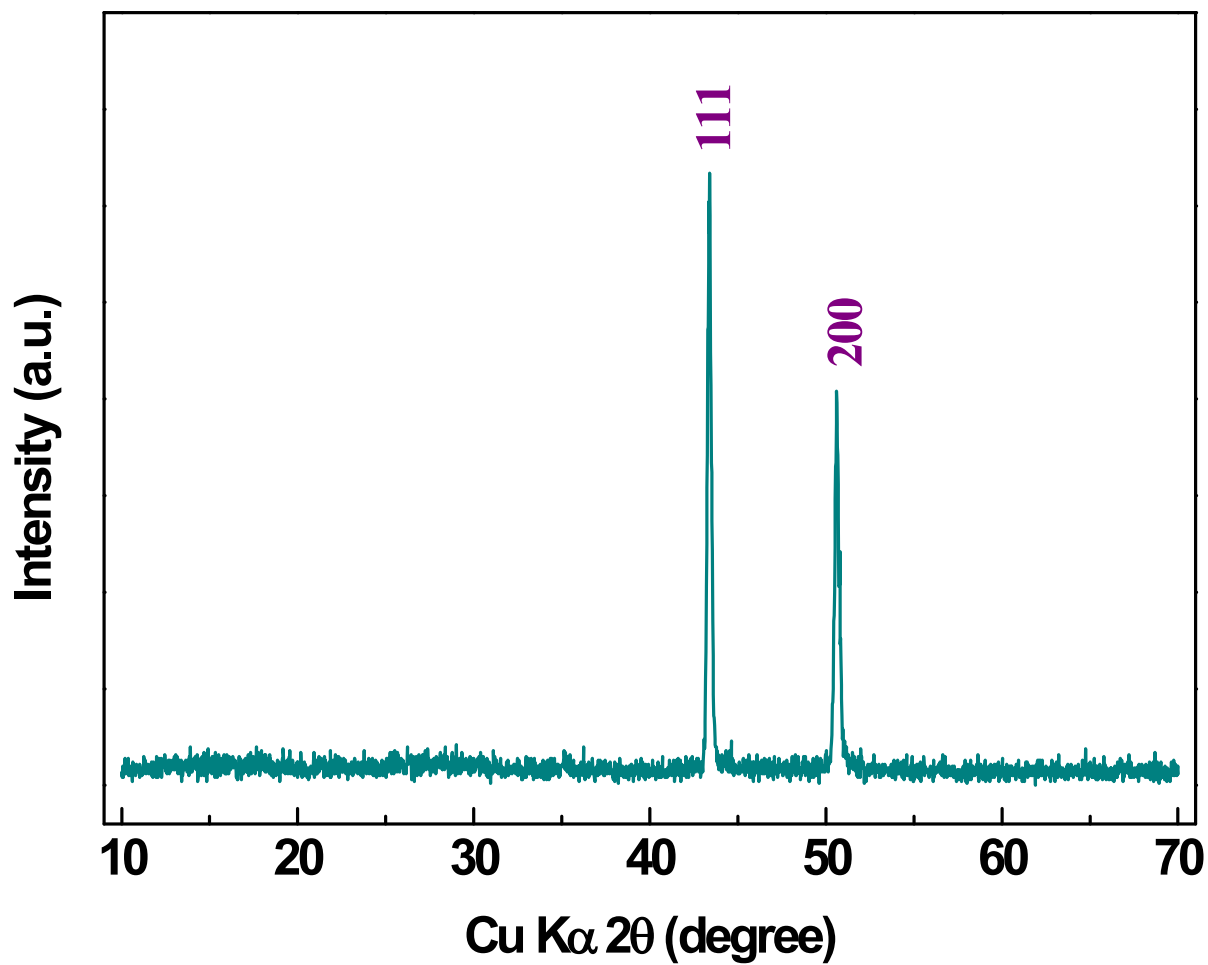

**Fig. S2.** XRD pattern of the Si/CNF electrode. No detectable peak for Si was observed. The two peaks can be indexed to the stainless steel (JCPDS no. 33-397).

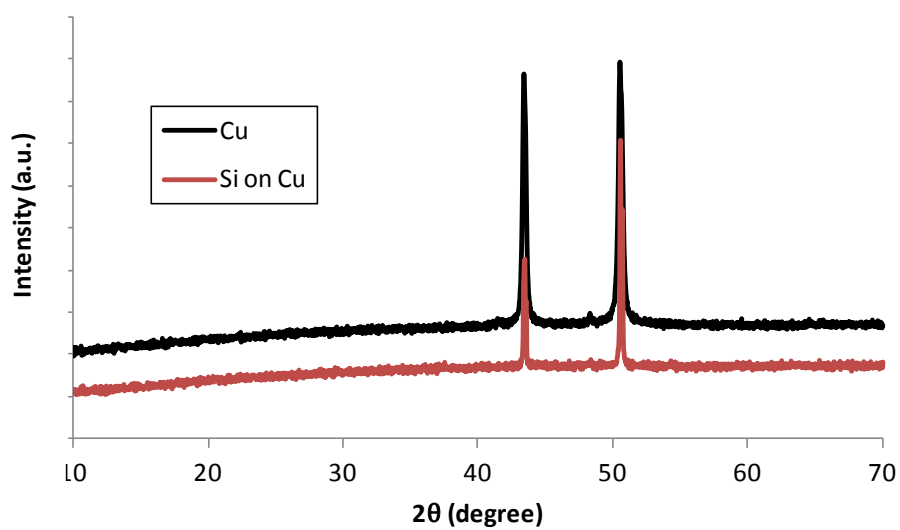

**Fig. S3.** X-ray diffraction patterns of Si film on Cu substrate (red line) and Cu substrate alone (black line).

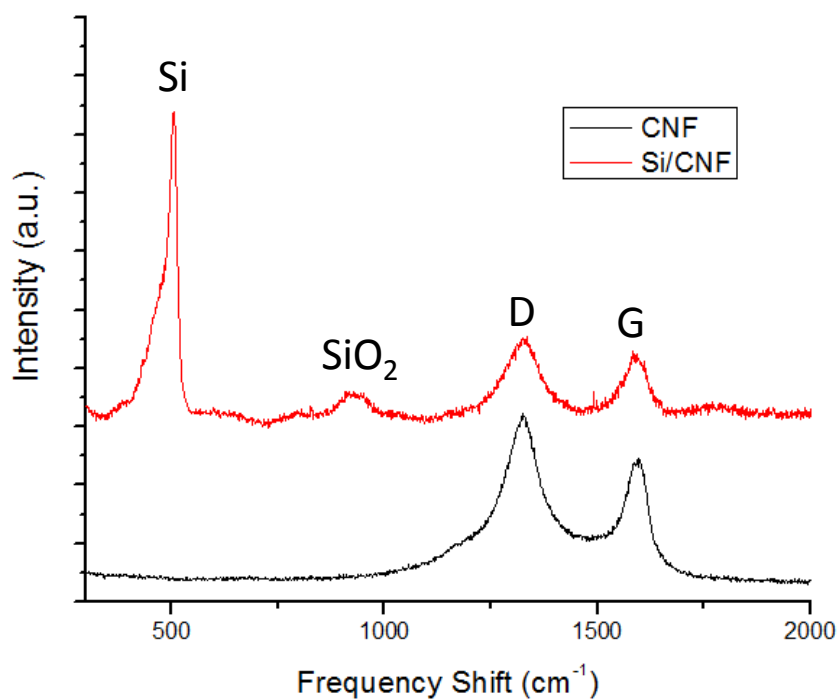

**Fig. S4.** Raman spectra of CNFs before and after the Si film deposition (red line: Si/CNF, black line: CNF).

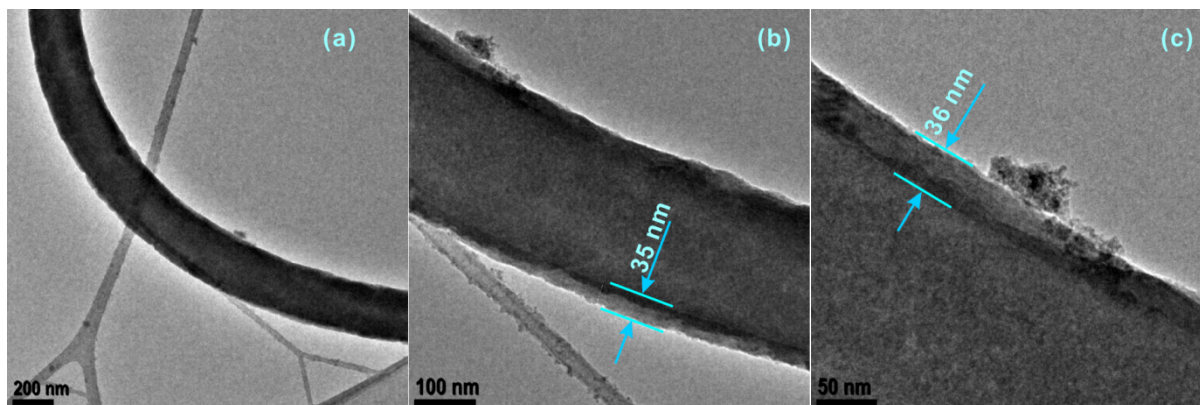

Fig. S5. TEM images of the Si/CNF composite anode after 200 cycles.

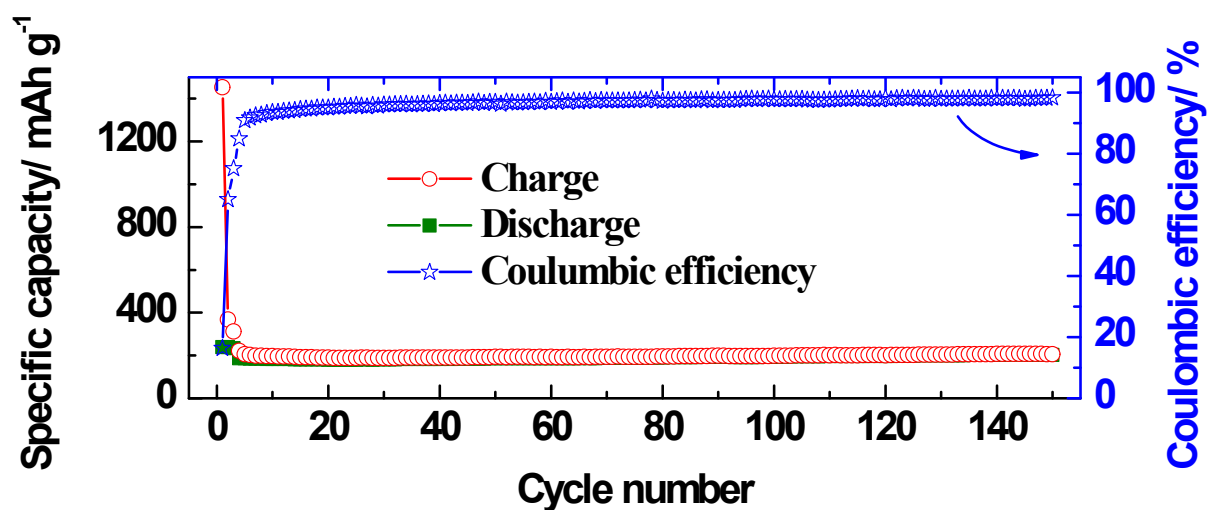

Fig. S6. Cycle performance of CNF alone electrode between 0.01 and 2.0 V at a current rate of 0.5 C (or 150 mA g<sup>-1</sup>) in the first 3 cycles, and 1 C (or 300 mA g<sup>-1</sup>) for the rest of the cycles.

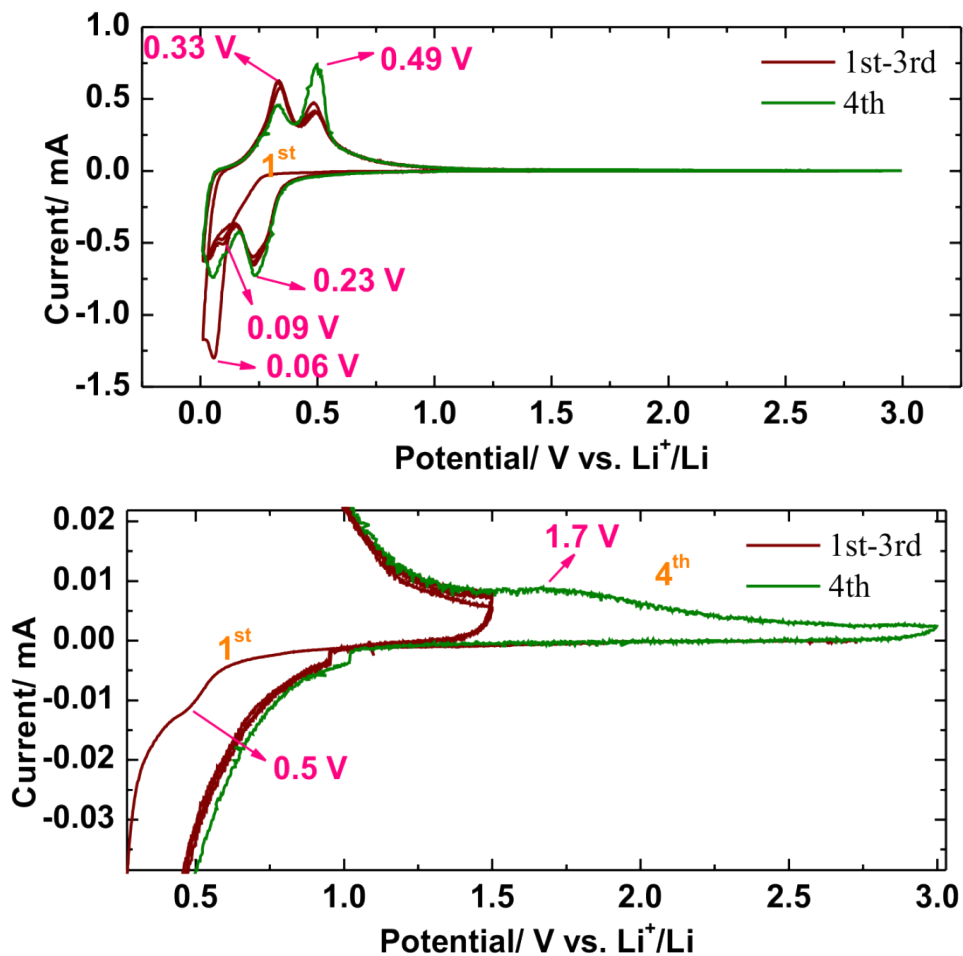

**Fig. S7.** Cyclic voltammetry (CV) of the Si/CNF anode. The initial 3 cycles were limited in the potential range between 0.01 and 1.5 V, while at the 4<sup>th</sup> cycle, the potential limit was extended to 3.0 V. The solid electrolyte interphase formation was observed at 0.5 V during the initial cathodic scan. The CV curves are typical for Si anodes, showing two cathodic peaks at 0.23 and 0.06 V and two anodic peaks at 0.33 and 0.49 V; the cathodic shoulder peak at 0.09 V and the anodic peak at 1.7 V are very likely due to the lithiation and delithiation of the CNF, a poorly crystallized carbon.

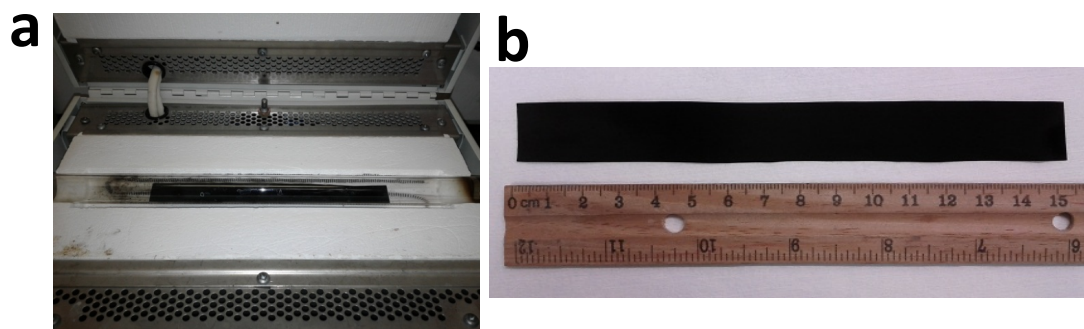

**Fig. S8.** CNFs grown on stainless steel foil. (a) CNF-grown stainless steel foil in CVD reactor. (b) CNFs are totally covered on both sides of stainless steel foil size of 15 × 150 mm.
